# Supplementary material for: Metastatic Castration-Resistant Prostate Cancer: 14-Year Real-World Sipuleucel-T Outcomes in Urology
Source: Research Square preprint supplement (doi:10.21203/rs.3.rs-7348924/v1), 2025-08-27
Supplement: Supplementary file 1 [file 945956d104efd5df23e82460.xlsx]

## Sheet: Tab1B
	Table 1B. PSM Analysis: Baseline Characteristics in the Overall Population, Cohort 1, and Cohort 2
	Characteristic	N	Overall	Matched Data	Unmatched Data	P-value
			N = 15,753	n = 4,488	n = 11,265
	Cohort, n (%)	15753				<.001a
	Cohort 1 (sipuleucel-T)		7,525 (48%)	2,244 (50%)	5,281 (47%)
	Cohort 2 (non-sipuleucel-T)		8,228 (52%)	2,244 (50%)	5,984 (53%)
	Age, years	15753				<.001b
	Mean (SD)		74.7 (9.5)	73.1 (9.0)	75.3 (9.5)
	Min - Max		36 - 89+	42 - 89+	36 - 89+
	Median (IQR)		75.0 (14.0)	73.0 (13.0)	76.0 (14.0)
	Age group, years, n (%)	15753				<.001a
	18-64		2,329 (15%)	793 (18%)	1,536 (14%)
	65-69		2,305 (15%)	704 (16%)	1,601 (14%)
	70-74		2,972 (19%)	951 (21%)	2,021 (18%)
	75-79		2,951 (19%)	853 (19%)	2,098 (19%)
	80-84		2,613 (17%)	733 (16%)	1,880 (17%)
	85-89+		2,583 (16%)	454 (10%)	2,129 (19%)
	Race, n (%)	15753				.066a
	Black/African American		2,311 (15%)	666 (15%)	1,645 (15%)
	White		10,415 (66%)	2,911 (65%)	7,504 (67%)
	Other		3,027 (19%)	911 (20%)	2,116 (19%)
	Geographic region, n (%)	15753				<.001a
	Midwest		3,989 (25%)	1,141 (25%)	2,848 (25%)
	Northeast		2,215 (14%)	408 (9.1%)	1,807 (16%)
	South		7,217 (46%)	2,146 (48%)	5,071 (45%)
	West		2,332 (15%)	793 (18%)	1,539 (14%)
	mCRPC diagnosis period, n (%)	15753				.005a
	2010-2014		3,311 (21%)	878 (20%)	2,433 (22%)
	2015-2019		12,442 (79%)	3,610 (80%)	8,832 (78%)
	Initial PSA level, categoric, n (%)	15427				.003a
	Low (≤3)		5,208 (34%)	1,595 (36%)	3,613 (33%)
	High (>3)		10,219 (66%)	2,893 (64%)	7,326 (67%)
	Gleason score at PCa diagnosis, categoric, n (%)	9,771				.532a
	Low (6)		1,903 (19%)	873 (19%)	1,030 (19%)
	Intermediate (7)		2,637 (27%)	1,235 (28%)	1,402 (27%)
	High (≥8)		5,231 (54%)	2,380 (53%)	2,851 (54%)
	Follow-up time since mCRPC diagnosis, years	15753				0.507c
	Mean (SD)		2.4 (2.3)	2.4 (2.3)	2.4 (2.3)
	Min - Max		0 - 13	0 - 13	0 - 13
	Median (IQR)		2.0 (3.0)	2.0 (3.0)	2.0 (3.0)
	Notes:
	P-values were calculated using the following tests:
	aPearson chi-squared test
	bWelch 2-sample t-test
	cWilcoxon rank-sum test
	Acronyms: IQR, interquartile range; mCRPC, metastatic castration-resistant prostate cancer; PCa, prostate cancer; PSA, prostate-specific antigen; PSM, propensity score matching; SD, standard deviation.
