# Supplementary material for: Metastatic Castration-Resistant Prostate Cancer: 14-Year Real-World Sipuleucel-T Outcomes in Urology
Source: Research Square preprint supplement (doi:10.21203/rs.3.rs-7348924/v1), 2025-08-27
Supplement: Supplementary file 2 [file c6222b666e169473f18bbc2e.xlsx]

## Sheet: Tab2
	Table 2. Main Analysis: Patients Surviving Versus Not Surviving at Least 5 Years After mCRPC Diagnosis
	Characteristic	N	Overall	Did Not Survive ≥5 Years	Survived ≥5 Years	P-value
			N = 11,265	N = 9,046 (80%)	N = 2,219 (20%)
	Age, years	11265				<.001a
	Mean (SD)		75.3 (9.5)	76.2 (9.6)	71.8 (8.5)
	Min - Max		36 - 89+	36 - 89+	43 - 89+
	Median (IQR)		76.0 (14.0)	77.0 (15.0)	72.0 (12.0)
	Race, n (%)	11265				<.001b
	Black/African American		1,645 (15%)	1,258 (14%)	387 (17%)
	White		7,504 (67%)	6,030 (67%)	1,474 (66%)
	Other		2,116 (19%)	1,758 (19%)	358 (16%)
	Geographic region, n (%)	11265				.406b
	Midwest		2,848 (25%)	2,281 (25%)	567 (26%)
	Northeast		1,807 (16%)	1,429 (16%)	378 (17%)
	South		5,071 (45%)	4,102 (45%)	969 (44%)
	West		1,539 (14%)	1,234 (14%)	305 (14%)
	Mortality, n (%)	11265	8,119 (72%)	7,230 (80%)	889 (40%)	<.001b
	Cohort, n (%)	11265				<.001b
	Cohort 1 (Sipuleucel-T)		5,281 (47%)	3,787 (42%)	1,494 (67%)
	Cohort 2 (Non-Sipuleucel-T)		5,984 (53%)	5,259 (58%)	725 (33%)
	Time from PCa diagnosis to mCRPC diagnosis, months	10840				<.001c
	Mean (SD)		40.6 (40.3)	39.5 (40.1)	45.5 (40.7)
	Min - Max		0 - 692.7	0 - 692.7	0 - 640.3
	Median (IQR)		28.5 (43.6)	27.1 (42.6)	34.7 (44.9)
	Notes:
	P-values were calculated using the following tests:
	aWelch 2-sample t-test
	bPearson chi-squared test
	cWilcoxon rank-sum test
	Acronyms: IQR, interquartile range; mCRPC, metastatic castration-resistant prostate cancer; PCa, prostate cancer; SD, standard deviation.
