# Supplementary material for: Metastatic Castration-Resistant Prostate Cancer: 14-Year Real-World Sipuleucel-T Outcomes in Urology
Source: Research Square preprint supplement (doi:10.21203/rs.3.rs-7348924/v1), 2025-08-27
Supplement: Supplementary file 3 [file c895dfa2199e13b041e22b1e.xlsx]

## Sheet: Tab1A
	Table 1A. Main Analysis: Baseline Characteristics in the Overall Population, Cohort 1, and Cohort 2
	Characteristic	N	Overall	Cohort 1 (Sipuleucel-T)	Cohort 2 (Non-Sipuleucel-T)	P-value
			N = 11,265	N = 5,281	N = 5,984
	Age, years	11265				<.001a
	Mean (SD)		75.3 (9.5)	73.4 (8.8)	77.0 (9.9)
	Min - Max		36 - 89+	42 - 89+	36 - 89+
	Median (IQR)		76.0 (14.0)	74.0 (13.0)	78.0 (15.0)
	Age group, years, n (%)	11265				<.001b
	18-64		1,536 (14)	834 (16)	702 (12)
	65-69		1,601 (14)	943 (18)	658 (11)
	70-74		2,021 (18)	1,067 (20)	954 (16)
	75-79		2,098 (19)	1,055 (20)	1,043 (17)
	80-84		1,880 (17)	813 (15)	1,067 (18)
	85-89+		2,129 (19)	569 (11)	1,560 (26)
	Race, n (%)	11265				<.001b
	Black/African American		1,645 (15)	765 (14)	880 (15)
	White		7,504 (67)	3,636 (69)	3,868 (65)
	Other		2,116 (19)	880 (17)	1,236 (21)
	Geographic region, n (%)	11265				.124b
	Midwest		2,848 (25)	1,317 (25)	1,531 (26)
	Northeast		1,807 (16)	823 (16)	984 (16)
	South		5,071 (45)	2,439 (46)	2,632 (44)
	West		1,539 (14)	702 (1)	837 (14)
	mCRPC diagnosis period, n (%)	11265				.595b
	2010-2014		2,433 (22)	1,129 (21)	1,304 (22)
	2015-2019		8,832 (78)	4,152 (79)	4,680 (78)
	Initial PSA level (ng/mL) at mCRPC diagnosis	10796				<.001a
	Mean (SD)		43.8 (109.1)	30.3 (84.5)	56.3 (126.2)
	Min - Max		0 - 1,000	0 - 984	0 - 1,000
	Median (IQR)		7.7 (29.7)	6.2 (21.3)	9.8 (42.6)
	PSA level >1,000*	143	143	31	112
	Initial PSA level (ng/mL) at mCRPC diagnosis, categoric, n (%)	10939				<.001b
	Low (≤3)		3,613 (33)	1,848 (36)	1,765 (31)
	High (>3)		7,326 (67)	3,349 (64)	3,977 (69)
	Initial PSA level (ng/mL) at mCRPC diagnosis by year, mean	11265
	2010 (n=54)		99.4	14.8	110	0.019
	2011 (n=194)		115.8	85.6	130.8	0.423
	2012 (n=478)		109.7	73.9	137.6	0.069
	2013 (n=753)		115.4	86.6	141.8	0.199
	2014 (n=954)		113.7	136.9	88.6	0.525
	2015 (n=1,414)		78.9	55.2	99.1	0.005
	2016 (n=1,812)		121.2	33.4	197.9	0.072
	2017 (n=2,214)		55.5	31.3	79.9	0
	2018 (n=2,284)		55.3	28.4	80.4	0
	2019 (n=1,108)		50.3	22.1	74.5	0
	ECOG score at mCRPC diagnosis, numeric**	277				<.001a
	Mean (SD)		0.6 (0.8)	0.2 (0.4)	0.8 (0.9)
	Min - Max		0 - 3	0 - 1	0 - 3
	Median (IQR)		0.0 (1.0)	0.0 (0.0)	1.0 (1.0)
	Gleason score at PCa diagnosis, numeric	5283				.064a
	Mean (SD)		7.3 (2.1)	7.3 (2.0)	7.2 (2.2)
	Min - Max		1.0-9.0	1.0-9.0	1.0-9.0
	Median (IQR)		8.0 (2.0)	8.0 (2.0)	8.0 (2.0)
	Gleason score at PCa diagnosis, categoric, n (%)	5283				.103b
	Low (6)		1,030 (19)	493 (19)	537 (20)
	Intermediate (7)		1,402 (27)	729 (28)	673 (25)
	High (≥8)		2,851 (54)	1,405 (53)	1,446 (54)
	Gleason score at mCRPC diagnosis, numeric	5563				.033a
	Mean (SD)		7.2 (2.1)	7.3 (2.0)	7.2 (2.2)
	Min - Max		1.0-9.0	1.0-9.0	1.0-9.0
	Median (IQR)		8.0 (2.0)	8.0 (2.0)	8.0 (2.0)
	Gleason score at mCRPC diagnosis, categoric, n (%)	5563				.056b
	Low (6)		1,062 (19)	507 (18)	555 (20)
	Intermediate (7)		1,523 (27)	798 (29)	725 (26)
	High (≥8)		2,978 (54)	1,480 (53)	1,498 (54)
	NCI comorbidity index at mCRPC diagnosis	11265				<.001a
	Mean (SD)		0.9 (1.5)	0.8 (1.4)	1.1 (1.7)
	Min - Max		0 - 12	0 - 10	0 - 12
	Median (IQR)		0.0 (1.0)	0.0 (1.0)	0.0 (2.0)
	Alive ≥5 years from mCRPC diagnosis, n (%)	11265	2,219 (20)	1,494 (28)	725 (12)	<.001b
	Follow-up since mCRPC diagnosis, years	11265				<.001c
	Mean (SD)		2.4 (2.3)	3.1 (2.4)	1.8 (2.1)
	Min - Max		0 - 13	0 - 13	0 - 13
	Median (IQR)		2.0 (3.0)	3.0 (4.0)	1.0 (3.0)
	Time from PCa diagnosis to mCRPC diagnosis, months	10840				<.001c
	Mean (SD)		40.7 (40.3)	42.8 (39.4)	38.7 (40.9)
	Min - Max		0 – 692.8	0 – 640.3	0 – 692.8
	Median (IQR)		28.5 (43.6)	31.2 (45.1)	26.2 (41.9)
	Mortality, n (%)	11265	8,119 (72)	3,612 (68)	4,507 (75)	<.001b
	Notes:
	*For PSA values, data entry errors in the patient EMRs were discovered in the structured dataset; accordingly, 143 patients who had values >1,000 ng/mL were removed from the continuous variable and grouped into a categorical variable. The continuous variable includes patients with values ≤1,000 ng/mL.
	**ECOG scores were sparsely reported in the dataset.
	P-values were calculated using the following tests:
	aWelch 2-sample t-test
	bPearson chi-squared test
	cWilcoxon rank-sum test
	Acronyms: ECOG, Eastern Cooperative Oncology Group; EMR, electronic medical record; IQR, interquartile range; mCRPC, metastatic castration-resistant prostate cancer; NCI, National Cancer Institute; PCa, prostate cancer; PSA, prostate-specific antigen; SD, standard deviation.
